# Supplementary material
Source: Springer Nature journal article supplement (https://www.springermedizin.de/resource/supplementary/12891_2011_1301_MOESM4_ESM.pdf/9507576)

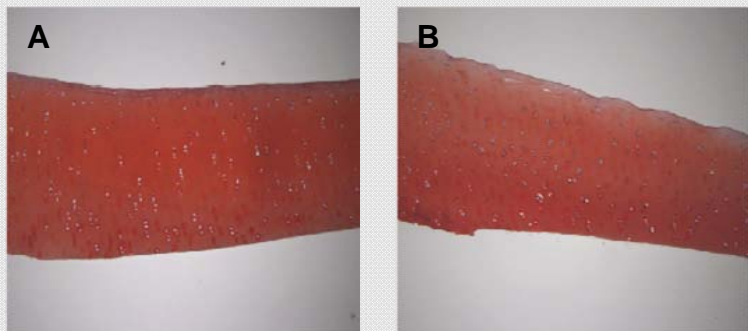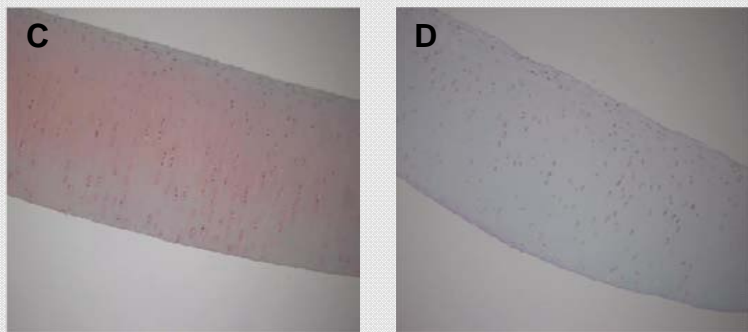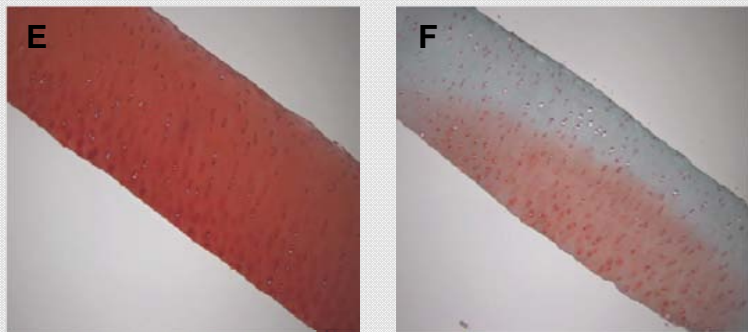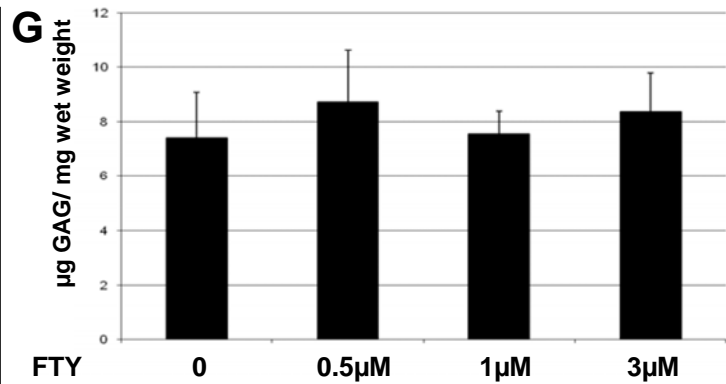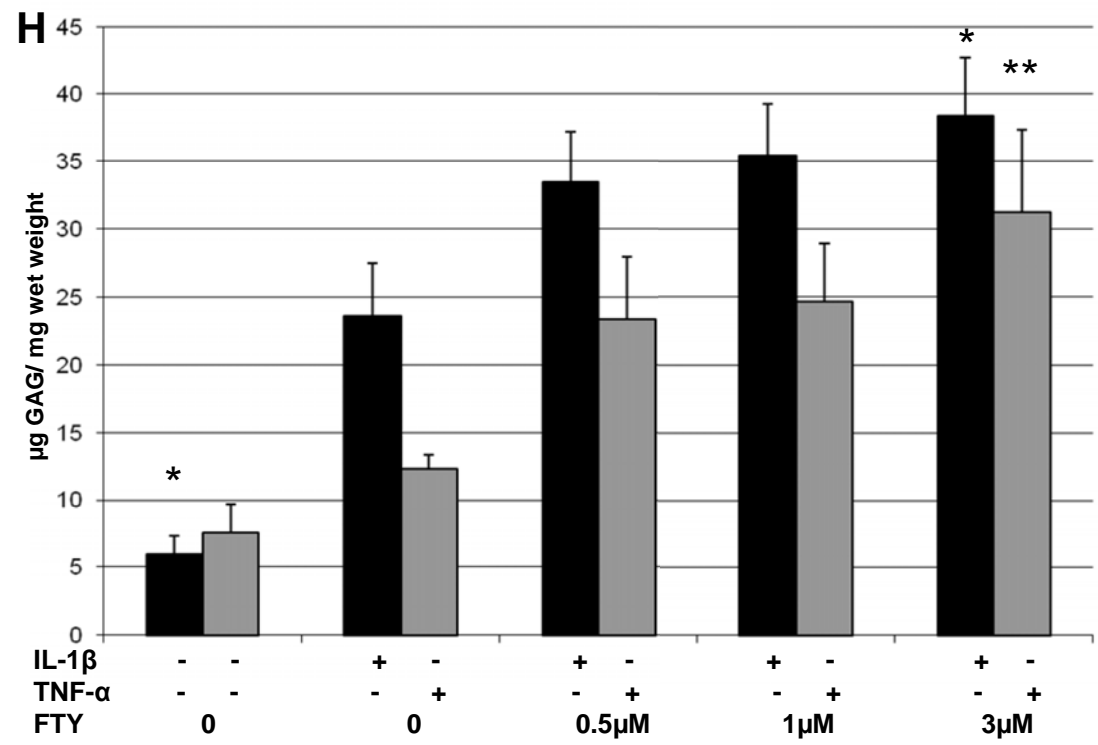

Supplement: MOESM4 [file 9507576]
